# Supplementary material for: The Synthetic Peptide LyeTx I mn∆K, Derived from Lycosa erythrognatha Spider Toxin, Is Active against Methicillin-Resistant Staphylococcus aureus (MRSA) In Vitro and In Vivo
Source: MDPI journal article supplement (doi:10.3390/antibiotics13030248), 2024-03-08
Supplement: s1 [file s1]

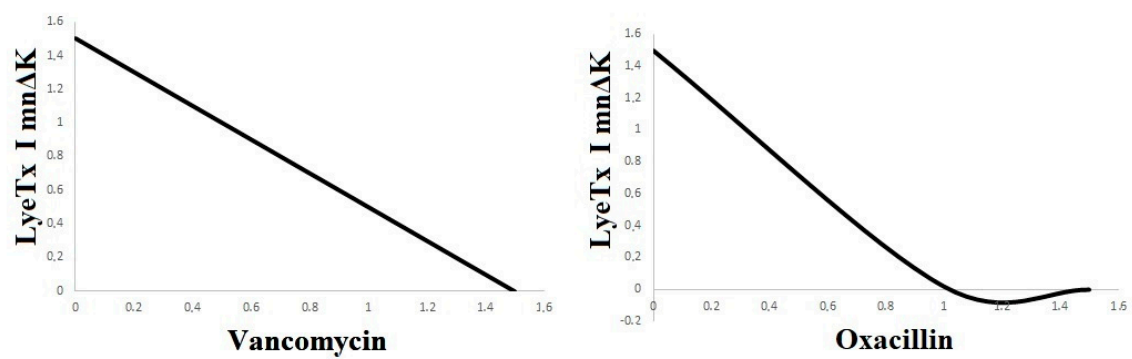

**Figure S1.** Isobolograms of combination of peptide LyeTx I mnΔK with vancomycin (A) and oxacillin (B) against methicillin-resistant *Staphylococcus aureus* (MRSA).

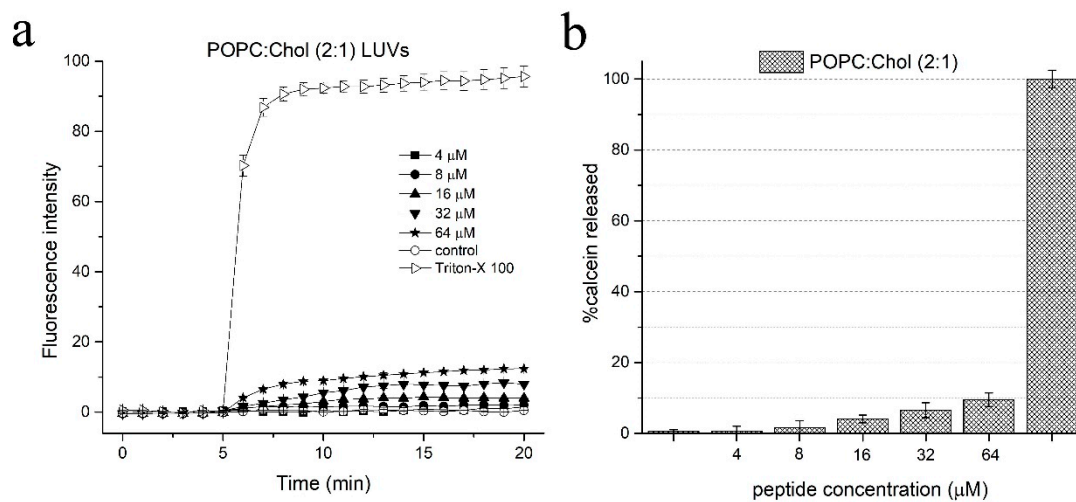

**Figure S2.** Effect of [LyeTx I mn $\Delta$ K] on phospholipid membranes as assessed by calcein release from POPC:CL (2:1, mol:mol) at 100  $\mu$ M of lipid concentration. **(a)** Time dependence of membrane permeability with LyeTx I mn $\Delta$ K and **(b)** percentage of calcein release compared to what was observed after addition of 2% Triton X-100 (positive control, considered as 100%). Data are representative of three independent experiments.

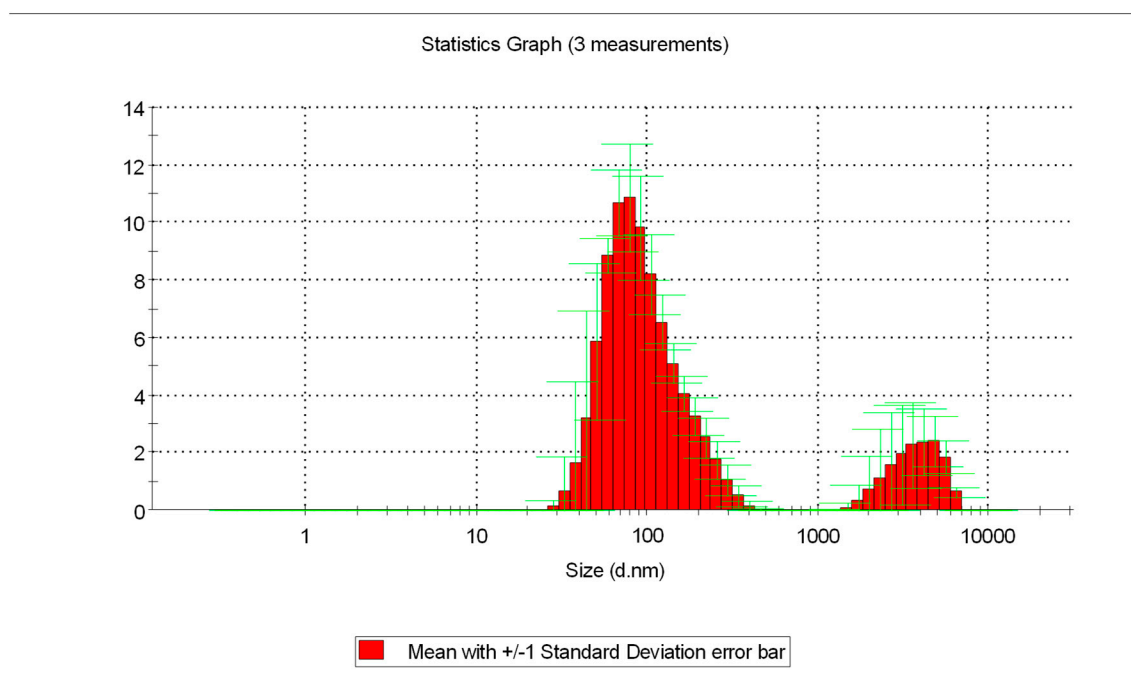

**Figure S3.** Histogram of size distribution of 200  $\mu$ M POPG:CL (2:1 mol/mol) in the presence of 30 mM of LyeTx 1 mn $\Delta$ K
